# Supplementary material
Source: Springer Nature journal article supplement (https://www.springermedizin.de/resource/supplementary/12985_2008_533_MOESM1_ESM.pdf/9608306)

NetPhos 2.0: predicted phosphorylation sites in Sequence

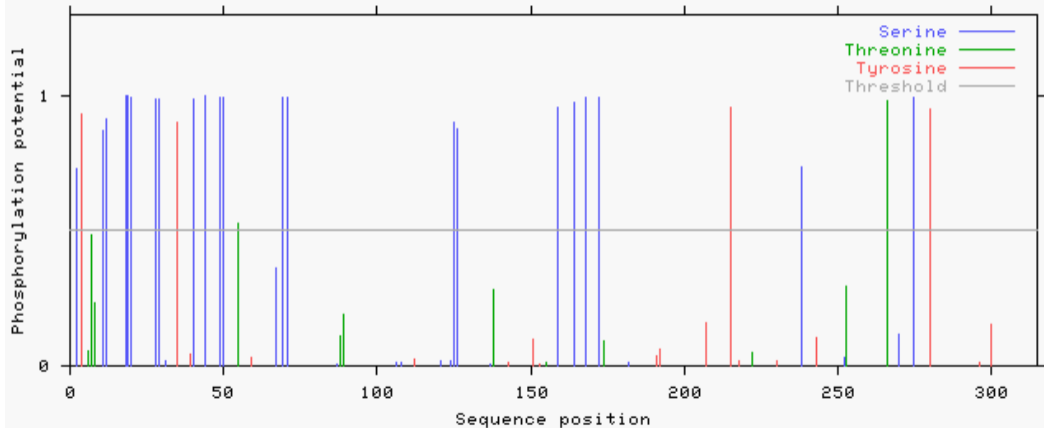

Supplement: MOESM1 [file 9608306]
